# Supplementary material for: Safety and Effectiveness of Molnupiravir in Japanese Patients with COVID-19: Final Report of Post-marketing Surveillance in Japan
Source: Springer Nature journal article supplement (doi:10.1007/s40121-023-00915-w), 2024-01-01
Supplement: MOESM1 [file 26636130]

## Supplementary materials

Title: Safety and effectiveness of molnupiravir in Japanese patients with COVID-19: final report of post-marketing surveillance in Japan

Authors: Shohei Shinozaki<sup>1</sup>, Asuka Watanabe<sup>2</sup>, Masahiro Kimata<sup>1</sup>, Makoto Miyazaki<sup>2</sup>, Shinichiroh Maekawa<sup>2</sup>

Author affiliations:

<sup>1</sup>Medical Affairs MSD K.K., Kitanomaru Square, 1-13-12 Kudan-kita, Chiyoda-ku, Tokyo 102-8667, Japan

<sup>2</sup>Pharmacovigilance MSD K.K., Kitanomaru Square, 1-13-12 Kudan-kita, Chiyoda-ku, Tokyo 102-8667, Japan

Corresponding author: Shohei Shinozaki

Medical Affairs MSD K.K., Kitanomaru Square, 1-13-12 Kudan-kita, Chiyoda-ku, Tokyo 102-8667, Japan

Corresponding author e-mail address: [shohei.shinozaki@merck.com](mailto:shohei.shinozaki@merck.com)

Supplementary Table 1. Summary of fatal cases due to adverse events and adverse drug reactions (safety analysis set)

|                                        | Number of patients |                       |
|----------------------------------------|--------------------|-----------------------|
|                                        | N = 3,179          |                       |
|                                        | Adverse event      | Adverse drug reaction |
| Any event <sup>a</sup>                 | 323 (10.16)        | 175 (5.50)            |
| Any serious event                      | 89 (2.80)          | 7 (0.22)              |
| Any fatal event                        | 39 (1.23)          | 3 (0.09)              |
| COVID-19                               | 9                  | 0                     |
| Pneumonia                              | 4                  | 0                     |
| Lymphoma                               | 2                  | 0                     |
| Hypoxia                                | 2                  | 1                     |
| Cardiac failure congestive             | 1                  | 1                     |
| Emphysematous cystitis                 | 1                  | 0                     |
| Acute respiratory failure              | 1                  | 1                     |
| Acute myeloid leukaemia                | 1                  | 0                     |
| Diet refusal                           | 1                  | 0                     |
| Respiratory disorder                   | 1                  | 0                     |
| Respiratory failure                    | 1                  | 0                     |
| Pneumonia aspiration                   | 1                  | 0                     |
| Pneumonia bacterial                    | 1                  | 0                     |
| Shock haemorrhagic                     | 1                  | 0                     |
| Cardiac failure                        | 1                  | 0                     |
| Neuroblastoma                          | 1                  | 0                     |
| Small cell lung cancer extensive stage | 1                  | 0                     |
| Prostate cancer stage IV               | 1                  | 0                     |
| Diabetic ketoacidosis                  | 1                  | 0                     |
| Breast cancer                          | 1                  | 0                     |
| Sepsis                                 | 1                  | 0                     |
| Lung adenocarcinoma stage IV           | 1                  | 0                     |
| End stage renal disease                | 1                  | 0                     |
| Asthenia                               | 1                  | 0                     |
| Bladder cancer stage IV                | 1                  | 0                     |
| Pancreatic carcinoma                   | 1                  | 0                     |

Values are given as n (%) or n.

<sup>a</sup>Observation period: mean, 38.3 days; median, 30.0 days.

COVID-19, coronavirus disease 2019

Supplementary Table 2. Serious adverse drug reactions (safety analysis set)

|                                                 | Number of patients | Number of events |
|-------------------------------------------------|--------------------|------------------|
| Any serious ADR                                 | 7 (0.22)           | 7                |
| Infections and infestations                     |                    |                  |
| COVID-19                                        | 2 (0.06)           | 2                |
| Cardiac disorders                               |                    |                  |
| Cardiac failure congestive                      | 1 (0.03)           | 1                |
| Respiratory, thoracic and mediastinal disorders |                    |                  |
| Acute respiratory failure                       | 1 (0.03)           | 1                |
| Hypoxia                                         | 1 (0.03)           | 1                |
| Hepatobiliary disorders                         |                    |                  |
| Hepatic function abnormal                       | 1 (0.03)           | 1                |
| Skin and subcutaneous tissue disorders          |                    |                  |
| Rash                                            | 1 (0.03)           | 1                |

Values are given as n (%) or n.

ADR, adverse drug reaction; COVID-19, coronavirus disease 2019

Supplementary Table 3. Baseline characteristics associated with adverse drug reactions (safety analysis set)

| Item                                     | Number of patients, n | Patients with ADR, n (%) | <i>P</i> value     |
|------------------------------------------|-----------------------|--------------------------|--------------------|
| Sex                                      |                       |                          |                    |
| Male                                     | 1,663                 | 92 (5.53)                | 1.000 <sup>a</sup> |
| Female                                   | 1,516                 | 83 (5.47)                |                    |
| Age, years                               |                       |                          |                    |
| 18 to < 65                               | 1257                  | 78 (6.21)                | 0.106 <sup>b</sup> |
| 65 to < 75                               | 751                   | 45 (5.99)                |                    |
| ≥ 75                                     | 1,118                 | 52 (4.65)                |                    |
| COVID-19 symptoms                        |                       |                          |                    |
| No                                       | 80                    | 1 (1.25)                 | 0.129 <sup>a</sup> |
| Yes                                      | 3,099                 | 174 (5.61)               |                    |
| History of COVID-19                      |                       |                          |                    |
| No                                       | 3,155                 | 174 (5.52)               | 0.620 <sup>a</sup> |
| Yes                                      | 17                    | 1 (5.88)                 |                    |
| COVID-19 severity at MOV initiation      |                       |                          |                    |
| Mild                                     | 2,748                 | 153 (5.57)               | 0.610 <sup>b</sup> |
| Moderate I                               | 325                   | 17 (5.23)                |                    |
| Moderate II                              | 95                    | 4 (4.21)                 |                    |
| Severe                                   | 1                     | 0 (0.00)                 |                    |
| Comorbidities                            |                       |                          |                    |
| No                                       | 489                   | 27 (5.52)                | 1.000 <sup>a</sup> |
| Yes                                      | 2,653                 | 147 (5.54)               |                    |
| Risk factors for severe COVID-19 illness |                       |                          |                    |
| No                                       | 136                   | 7 (5.15)                 | 1.000 <sup>a</sup> |
| Yes                                      | 3,043                 | 168 (5.52)               |                    |
| Prior treatment for COVID-19             |                       |                          |                    |
| No                                       | 2,952                 | 169 (5.72)               | 0.275 <sup>a</sup> |
| Yes                                      | 150                   | 5 (3.33)                 |                    |
| Other medications                        |                       |                          |                    |
| No                                       | 2,282                 | 126 (5.52)               | 0.723 <sup>a</sup> |
| Yes                                      | 817                   | 48 (5.88)                |                    |
| SARS-CoV-2 vaccination                   |                       |                          |                    |
| No                                       | 276                   | 10 (3.62)                | 0.135 <sup>a</sup> |
| Yes                                      | 2,619                 | 158 (6.03)               |                    |
| Hepatic impairment                       |                       |                          |                    |
| No                                       | 3,082                 | 167 (5.42)               | 0.095 <sup>a</sup> |
| Yes                                      | 67                    | 7 (10.45)                |                    |
| Renal impairment                         |                       |                          |                    |
| No                                       | 2,863                 | 154 (5.38)               | 0.276 <sup>a</sup> |
| Yes                                      | 286                   | 20 (6.99)                |                    |
| Hemodialysis                             |                       |                          |                    |
| No                                       | 3,025                 | 169 (5.59)               | 0.653 <sup>a</sup> |
| Yes                                      | 95                    | 6 (6.32)                 |                    |
| Use of oxygen or mechanical ventilation  |                       |                          |                    |
| No                                       | 2,988                 | 169 (5.66)               | 0.410 <sup>a</sup> |
| Yes                                      | 114                   | 4 (3.51)                 |                    |

<sup>a</sup>Fisher's exact test.<sup>b</sup>Wilcoxon rank sum test.

ADR, adverse drug reaction; COVID-19, coronavirus disease 2019; MOV, molnupiravir; SARS-CoV-2, severe acute respiratory syndrome coronavirus 2

Supplementary Table 4. Summary of cumulative incidence of events (effectiveness analysis set)

| Item                                                                                      | Overall<br>N = 2,988    | Outpatients<br>N = 2,006 | Inpatients<br>N = 925   | Others<br>N = 57        |
|-------------------------------------------------------------------------------------------|-------------------------|--------------------------|-------------------------|-------------------------|
| <b>Age group</b>                                                                          |                         |                          |                         |                         |
| ≥ 80 years                                                                                | 759 (25.40)             | 350 (17.45)              | 357 (38.59)             | 52 (91.23)              |
| < 80 years                                                                                | 2,177 (72.86)           | 1,633 (81.41)            | 539 (58.27)             | 5 (8.77)                |
| Age unknown                                                                               | 52 (1.74)               | 23 (1.15)                | 29 (3.14)               | 0 (0.00)                |
| <b>All-cause death through day 29</b>                                                     |                         |                          |                         |                         |
| Alive                                                                                     | 2,954 (98.86)           | 2,004 (99.90)            | 899 (97.19)             | 51 (89.47)              |
| Dead                                                                                      | 34 (1.14)               | 2 (0.10)                 | 26 (2.81)               | 6 (10.53)               |
| <b>Age group</b>                                                                          |                         |                          |                         |                         |
| ≥ 80 years                                                                                | 24 (3.16 <sup>a</sup> ) | 2 (0.57 <sup>a</sup> )   | 16 (4.48 <sup>a</sup> ) | 6 (11.54 <sup>a</sup> ) |
| < 80 years                                                                                | 9 (0.41 <sup>b</sup> )  | 0 (0.00 <sup>b</sup> )   | 9 (1.67 <sup>b</sup> )  | 0 (0.00 <sup>b</sup> )  |
| Age unknown                                                                               | 1 (1.92 <sup>c</sup> )  | 0 (0.00 <sup>c</sup> )   | 1 (3.45 <sup>c</sup> )  | -                       |
| <b>Cause</b>                                                                              |                         |                          |                         |                         |
| Related to COVID-19                                                                       | 12 (0.40)               | 0 (0.00)                 | 10 (1.08)               | 2 (3.51)                |
| Unrelated to COVID-19                                                                     | 22 (0.74)               | 2 (0.10)                 | 16 (1.73)               | 4 (7.02)                |
| <b>Oxygen or mechanical ventilation use at molnupiravir initiation<sup>d</sup></b>        |                         |                          |                         |                         |
| Oxygen                                                                                    | 106 (3.55)              | 7 (0.35)                 | 96 (10.38)              | 3 (5.26)                |
| Mechanical ventilation                                                                    | 3 (0.10)                | 1 (0.05)                 | 2 (0.22)                | 0 (0.00)                |
| Unspecified respiratory support                                                           | 2 (0.07)                | 1 (0.05)                 | 1 (0.11)                | 0 (0.00)                |
| <b>Oxygen or mechanical ventilation initiation during or after molnupiravir treatment</b> |                         |                          |                         |                         |
| Oxygen                                                                                    | 46 (1.54)               | 10 (0.50)                | 33 (3.57)               | 3 (5.26)                |
| Mechanical ventilation                                                                    | 0 (0.00)                | 0 (0.00)                 | 0 (0.00)                | 0 (0.00)                |
| Unspecified respiratory support                                                           | 0 (0.00)                | 0 (0.00)                 | 0 (0.00)                | 0 (0.00)                |

Values are given as n (%).

<sup>a</sup>Percentage among patients aged ≥ 80 years.

<sup>b</sup>Percentage among patients aged < 80 years.

<sup>c</sup>Percentage among patients with unknown age.

<sup>d</sup>Patients who used both oxygen and mechanical ventilation were included in the mechanical ventilation category.

COVID-19, coronavirus disease 2019

Supplementary Table 5. Baseline characteristics associated with outpatient hospitalization<sup>a</sup> or all-cause death through day 29 (2,006 outpatients in effectiveness analysis set)

| Item                                               | Patients with events, n (%)       | OR (95% CI)               |
|----------------------------------------------------|-----------------------------------|---------------------------|
| Sex                                                |                                   |                           |
| Female vs. Male                                    | 25/954 (2.62) vs. 22/1,052 (2.09) | 1.26 (0.71, 2.25)         |
| Age, years                                         |                                   |                           |
| 18 to < 65 vs. 65 to < 75                          | 14/935 (1.50) vs. 5/520 (0.96)    | 1.57 (0.56, 4.37)         |
| ≥ 75 vs. 65 to < 75                                | 28/528 (5.30) vs. 5/520 (0.96)    | 5.77 (2.21, 15.06)        |
| BMI, kg/m <sup>2</sup>                             |                                   |                           |
| ≥ 30 vs. 18.5 to < 25                              | 4/136 (2.94) vs. 10/456 (2.19)    | 1.35 (0.42, 4.38)         |
| COVID-19 symptoms                                  |                                   |                           |
| No vs. Yes                                         | 0/28 (0.00) vs. 47/1,978 (2.38)   | < 0.01 (< 0.01, > 999.99) |
| History of COVID-19                                |                                   |                           |
| Yes vs. No                                         | 0/9 (0.00) vs. 47/1,996 (2.35)    | < 0.01 (< 0.01, > 999.99) |
| COVID-19 severity at MOV initiation                |                                   |                           |
| Moderate I vs. Mild                                | 11/122 (9.02) vs. 34/1,860 (1.83) | 5.32 (2.63, 10.79)        |
| Moderate II vs. Mild                               | 2/18 (11.11) vs. 34/1,860 (1.83)  | 6.71 (1.49, 30.35)        |
| Comorbidities                                      |                                   |                           |
| No vs. Yes                                         | 5/393 (1.27) vs. 42/1,583 (2.65)  | 0.47 (0.19, 1.20)         |
| Risk factors for severe COVID-19 illness           |                                   |                           |
| No vs. Yes                                         | 0/97 (0.00) vs. 47/1,909 (2.46)   | < 0.01 (< 0.01, > 999.99) |
| Number of risk factors for severe COVID-19 illness |                                   |                           |
| 2 vs. 1                                            | 17/599 (2.84) vs. 5/662 (0.76)    | 3.84 (1.41, 10.47)        |
| 3 vs. 1                                            | 11/409 (2.69) vs. 5/662 (0.76)    | 3.63 (1.25, 10.53)        |
| ≥ 4 vs. 1                                          | 14/239 (5.86) vs. 5/662 (0.76)    | 8.18 (2.91, 22.95)        |
| Prior treatment for COVID-19                       |                                   |                           |
| Yes vs. No                                         | 3/91 (3.30) vs. 43/1,857 (2.32)   | 1.44 (0.44, 4.73)         |
| Other medications                                  |                                   |                           |
| Yes vs. No                                         | 20/407 (4.91) vs. 20/1,539 (1.30) | 3.93 (2.09, 7.37)         |
| SARS-CoV-2 vaccination                             |                                   |                           |
| No vs. Yes                                         | 5/151 (3.31) vs. 40/1,694 (2.36)  | 1.42 (0.55, 3.64)         |
| SpO <sub>2</sub> at MOV initiation, %              |                                   |                           |
| 94-95 vs. ≥ 96                                     | 5/72 (6.94) vs. 22/979 (2.25)     | 3.25 (1.19, 8.84)         |
| ≤ 93 vs. ≥ 96                                      | 5/21 (23.81) vs. 22/979 (2.25)    | 13.59 (4.57, 40.41)       |
| Hepatic impairment                                 |                                   |                           |
| Yes vs. No                                         | 2/37 (5.41) vs. 45/1,943 (2.32)   | 2.41 (0.56, 10.33)        |
| Renal impairment                                   |                                   |                           |
| Yes vs. No                                         | 13/90 (14.44) vs. 34/1,890 (1.80) | 9.22 (4.68, 18.17)        |
| Hemodialysis                                       |                                   |                           |
| Yes vs. No                                         | 3/19 (15.79) vs. 44/1,948 (2.26)  | 8.11 (2.28, 28.86)        |

<sup>a</sup>Hospitalization for reasons other than isolation or assessment.

BMI, body mass index; CI, confidence interval; COVID-19, coronavirus disease 2019; MOV, molnupiravir; OR, odds ratio; SARS-CoV-2, severe acute respiratory syndrome coronavirus 2; SpO<sub>2</sub>, peripheral oxygen saturation

Supplementary Table 6. Baseline characteristics associated with inpatient oxygen initiation or all-cause death through day 29 (826 inpatients<sup>a</sup> in effectiveness analysis set)

| Item                                               | Patients with events, n (%)     | OR (95% CI)               |
|----------------------------------------------------|---------------------------------|---------------------------|
| Sex                                                |                                 |                           |
| Female vs. Male                                    | 18/398 (4.52) vs. 20/428 (4.67) | 0.97 (0.50, 1.85)         |
| Age, years                                         |                                 |                           |
| 18 to < 65 vs. 65 to < 75                          | 4/232 (1.72) vs. 7/176 (3.98)   | 0.42 (0.12, 1.47)         |
| ≥ 75 vs. 65 to < 75                                | 27/393 (6.87) vs. 7/176 (3.98)  | 1.78 (0.76, 4.17)         |
| BMI, kg/m <sup>2</sup>                             |                                 |                           |
| ≥ 30 vs. 18.5 to < 25                              | 1/65 (1.54) vs. 17/398 (4.27)   | 0.35 (0.05, 2.68)         |
| COVID-19 symptoms                                  |                                 |                           |
| No vs. Yes                                         | 1/45 (2.22) vs. 37/781 (4.74)   | 0.46 (0.06, 3.41)         |
| History of COVID-19                                |                                 |                           |
| Yes vs. No                                         | 0/6 (0.00) vs. 38/815 (4.66)    | < 0.01 (< 0.01, > 999.99) |
| COVID-19 severity at MOV initiation                |                                 |                           |
| Moderate I vs. Mild                                | 11/141 (7.80) vs. 26/659 (3.95) | 2.06 (0.99, 4.27)         |
| Moderate II vs. Mild                               | 1/23 (4.35) vs. 26/659 (3.95)   | 1.11 (0.14, 8.53)         |
| Comorbidities                                      |                                 |                           |
| No vs. Yes                                         | 0/59 (0.00) vs. 38/762 (4.99)   | < 0.01 (< 0.01, > 999.99) |
| Risk factors for severe COVID-19 illness           |                                 |                           |
| No vs. Yes                                         | 1/32 (3.13) vs. 37/794 (4.66)   | 0.66 (0.09, 4.97)         |
| Number of risk factors for severe COVID-19 illness |                                 |                           |
| 2 vs. 1                                            | 9/211 (4.27) vs. 8/210 (3.81)   | 1.12 (0.43, 2.97)         |
| 3 vs. 1                                            | 10/196 (5.10) vs. 8/210 (3.81)  | 1.36 (0.52, 3.51)         |
| ≥ 4 vs. 1                                          | 10/177 (5.65) vs. 8/210 (3.81)  | 1.51 (0.58, 3.92)         |
| Prior treatment for COVID-19                       |                                 |                           |
| Yes vs. No                                         | 3/38 (7.89) vs. 35/788 (4.44)   | 1.84 (0.54, 6.29)         |
| Other medications                                  |                                 |                           |
| Yes vs. No                                         | 15/305 (4.92) vs. 23/521 (4.41) | 1.12 (0.58, 2.18)         |
| SARS-CoV-2 vaccination                             |                                 |                           |
| No vs. Yes                                         | 5/95 (5.26) vs. 32/656 (4.88)   | 1.08 (0.41, 2.85)         |
| SpO <sub>2</sub> at MOV initiation, %              |                                 |                           |
| 94-95 vs. ≥ 96                                     | 10/118 (8.47) vs. 24/622 (3.86) | 2.31 (1.07, 4.96)         |
| ≤ 93 vs. ≥ 96                                      | 2/27 (7.41) vs. 24/622 (3.86)   | 1.99 (0.45, 8.91)         |
| Hepatic impairment                                 |                                 |                           |
| Yes vs. No                                         | 3/25 (12.00) vs. 35/799 (4.38)  | 2.98 (0.85, 10.42)        |
| Renal impairment                                   |                                 |                           |
| Yes vs. No                                         | 11/151 (7.28) vs. 27/673 (4.01) | 1.88 (0.91, 3.88)         |
| Hemodialysis                                       |                                 |                           |
| Yes vs. No                                         | 9/64 (14.06) vs. 29/762 (3.81)  | 4.14 (1.87, 9.17)         |

<sup>a</sup>Inpatients who did not use oxygen or mechanical ventilation at baseline.

BMI, body mass index; CI, confidence interval; COVID-19, coronavirus disease 2019; MOV, molnupiravir; OR, odds ratio; SARS-CoV-2, severe acute respiratory syndrome coronavirus 2; SpO<sub>2</sub>, peripheral oxygen saturation
